# Supplementary material for: Neuropsychological assessment in preclinical and prodromal Alzheimer disease: a global perspective
Source: PubMed Central journal article supplement (PMC6486120; doi:10.7189/jogh.09.010317), 2019-06
Supplement: jogh-09-010317-s001.pdf [file jogh-09-010317-s001.pdf]

**J Glob Health 2019; 9: 010317**

### **Supplementary references**

s11 Albert MS, DeKosky ST, Dickson D, Dubois B, Feldman HH, Fox NC, et al. The diagnosis of mild cognitive impairment due to Alzheimer's disease: recommendations from the National Institute on Aging-Alzheimer's Association workgroups on diagnostic guidelines for Alzheimer's disease. *Alzheimers Dement.* 2011;7:270-9.

s12 Jack CR, Jr., Bennett DA, Blennow K, Carrillo MC, Dunn B, Haeberlein SB, et al. NIA-AA Research Framework: Toward a biological definition of Alzheimer's disease. *Alzheimers Dement.* 2018;14:535-62.

s13 Fox NC, Black RS, Gilman S, Rossor MN, Griffith SG, Jenkins L, et al. Effects of Abeta immunization (AN1792) on MRI measures of cerebral volume in Alzheimer disease. *Neurology.* 2005;64:1563-72.

s14 Albert M, Zhu Y, Moghekar A, Mori S, Miller MI, Soldan A, et al. Predicting progression from normal cognition to mild cognitive impairment for individuals at 5 years. *Brain.* 2018;141:877-87.

s15 Logie RH, Parra MA, Della Sala S. From Cognitive Science to Dementia Assessment. *Policy Insights Behav Brain Sci.* 2015;2:81-91.

s16 Hoefijzers SaC, Clara and Parra, Mario A. Is it time to change the way we detect Alzheimer's disease and monitor its progression? Towards affordable and theory-driven approaches from cognitive neurosciences. *JSM Alzheimers Dis Relat Dement.* 2016; 3 1028

s17 K Ritchie, M Ropacki, B Albala, J Harrison, J Kaye, J Kramer, C Randolph, CW Ritchie. Recommended cognitive outcomes in preclinical Alzheimer's disease: Consensus statement from the European Prevention of Alzheimer's Dementia project. *Alzheimers Dement.* 2017 Feb;13(2):186-195. doi: 10.1016/j.jalz.2016.07.154.

s18 DM Rentz, MA Parra Rodriguez, R Amariglio, Y Stern, R Sperling and S Ferris. Promising developments in neuropsychological approaches for the detection of preclinical Alzheimer's disease: a selective review. *Alzheimers Res Ther.* 2013 Nov 21;5(6):58. doi: 10.1186/alzrt222. eCollection 2013.

s19 Donohue MC, Sperling RA, Salmon DP, Rentz DM, Raman R, Thomas RG, et al. The preclinical Alzheimer cognitive composite: measuring amyloid-related decline. *JAMA Neurol.* 2014;71:961-70.

s20 Paulino Ramirez Diaz S, Gil Gregório P, Manuel Ribera Casado J, Reynish E, Jean Ousset P, Vellas B, et al. The need for a consensus in the use of assessment tools for Alzheimer's disease: the Feasibility Study (assessment tools for dementia in Alzheimer Centres across Europe), a European Alzheimer's Disease Consortium's (EADC) survey. *Int J Geriatr Psychiatry.* 2005;20:744-8

s21 Costa, T Bak, P Caffarra, C Caltagirone, M Ceccaldi, F Collette, et al. The need for harmonisation and innovation of neuropsychological assessment in neurodegenerative

dementias in Europe: consensus document of the Joint Program for Neurodegenerative Diseases Working Group. *Alzheimers Res Ther.* 2017; 9:27. <https://doi.org/10.1186/s13195-017-0254-x>

s22 MA Parra. Overcoming barriers in cognitive assessment of Alzheimer's disease. *Dement Neuropsychol.* 2014;8(2):95-98.

S23 J Manly. Advantages and Disadvantages of Separate Norms for African Americans. *Clin Neuropsychol*, 2005; 19(2): 270-275. doi: 10.1080/13854040590945346

s24 M Rivera Mindt, D Byrd , P Saez & J Manly. Increasing Culturally Competent Neuropsychological Services for Ethnic Minority Populations: A Call to Action. *Clin Neuropsychol*; 2009; 24(3): 429-453

s25 Fillenbaum G, Heyman A, Williams K, Prosnitz B, Burchett B. Sensitivity and specificity of standardized screens of cognitive impairment and dementia among elderly black and white community residents. *J Clin Epidemiol.* 1990;43:651-60.

s26 Gurland BJ, Wilder DE, Cross P, Teresi J, Barrett VW. Screening scales for dementia: Toward reconciliation of conflicting cross-cultural findings. *Int J Geriatr Psychiatry.* 1992;7:105-13.

s27 Manly JJ, Echemendia RJ. Race-specific norms: using the model of hypertension to understand issues of race, culture, and education in neuropsychology. *Arch Clin Neuropsychol.* 2007;22:319-25.

s28 Altarriba J. The Influence of Culture on Cognitive Processes. In: Altarriba J, editor. *Advances in Psychology.* 103: North-Holland; 1993. p. 379-84.

s29 SE O'Bryant, JD Humphreys, GE Smith, RJ Ivnik, NR Graff-Radford. RC Petersen et al. Detecting dementia with the mini-mental state examination in highly educated individuals. *Arch Neurol.* 2008;65(7):963-7. doi: [10.1001/archneur.65.7.963]

s30 A Ardila, PH Bertolucci, LW Braga, A Castro-Caldas, TJudd, MH Kosmidis, et al. Illiteracy: The Neuropsychology of Cognition Without Reading, *Arch Clin Neuropsychol*, 2010; 25(8):689–712

s31 AT Jotheeswaran, JD Williams, MJ Prince. The predictive validity of the 10/66 dementia diagnosis in Chennai, India: a 3-year follow-up study of cases identified at baseline. *Alzheimer Dis Assoc Disord.* 2010;24(3):296-302.

s32 M Prince, D Acosta, H Chiu, M Sczufca and M Varghese. Dementia diagnosis in developing countries: A cross-cultural validation study. *Lancet*, 2003; 361(9361): 909-917.

s33 MA Parra. Overcoming barriers in cognitive assessment of Alzheimer's disease. *Dement Neuropsychol.* 2014;8(2):95-98.

s34 MA Parra, SD Sala, A Abrahams, RH Logie, LG Mendez, F Lopera. Specific deficit of colour-colour short-term memory binding in sporadic and familial Alzheimer's disease. *Neuropsychologia.* 2011;49:1943-1952

s35 Della Sala S, Parra MA, Fabi K, Luzzi S, Abrahams S. Short-term memory binding is impaired in AD but not in non-AD dementias. *Neuropsychologia.* 2012;50:833-40

s36 E Tulving. Elements of episodic memory, Clarendon Press, Oxford. 1983.

s37 F Newcombe and L Artioli Fortuny. Problems and perspectives in the evaluation of psychological deficits after cerebral lesions. *Int Rehabil Med.* 2009; 1(4): 182-192. Doi: <https://doi.org/10.3109/03790797909164041>

s38 A Prestia, R Rossi, C Geroldi, S Galluzzi, M Etti, G Alaimo, G., et al. Validation study of the three-objects-three-places test: A screening test for Alzheimer's disease. *Exp Aging Res.* 2006; 32:395–410. doi:10.1080/03610730600875767.

s39 Rentz DM, Amariglio RE, Becker JA, Frey M, Olson LE, Frishe K, et al. Face-name associative memory performance is related to amyloid burden in normal elderly. *Neuropsychologia.* 2011;49:2776-83.

s40 Sperling RA, Laviolette PS, O'Keefe K, O'Brien J, Rentz DM, Pihlajamaki M, et al. Amyloid deposition is associated with impaired default network function in older persons without dementia. *Neuron.* 2009;63:178-88

s41 Alegret M, Valero S, Ortega G, Espinosa A, Sanabria A, Hernández I, et al. Validation of the Spanish Version of the Face Name Associative Memory Exam (S-FNAME) in Cognitively Normal Older Individuals. *Arch Clin Neuropsychol.* 2015;30:712-20.

s42 Lukose A, Kv R, N Rao G, Palanimuthu Thangaraju S, Ritchie K, Rao N. Cross-cultural adaptation of the Computerized Assessment of Information Processing battery (COGNITO) for an Indian longitudinal study on rural elderly: An elucidation of the adaptation process. Alzheimer's Association International Conference® (AAIC®) Satellite Symposium, 18-19 December 2018, Bengaluru, India

s43 Ardila A, Moreno S. Neuropsychological test performance in Aruaco Indians: an exploratory study. *J Int Neuropsychol Soc.* 2001;7:510-5.

s44 GW Humphreys, MD Duta, L Montana, N Demeyere, C McCrory, J Rohr et al. Cognitive Function in Low-Income and Low-Literacy Settings: Validation of the Tablet-Based Oxford Cognitive Screen in the Health and Aging in Africa: A Longitudinal Study of an INDEPTH Community in South Africa (HAALSI). *J Gerontol B Psychol Sci Soc Sci.* 2016;72(1):38-50.

s45 PA Areán, LK Hoa, G Andersson. Mobile technology for mental health assessment. *Dialogues Clin Neurosci.* 2016;18(2):163-9.

s46 S Tu, S Wong, JR Hodges, M Irish, O Piguet, M Hornberger. Lost in spatial translation. A novel tool to objectively assess spatial disorientation in Alzheimer's disease and frontotemporal dementia. *Cortex.* 2015; 67:83-94

s47 S Serino, P Cipresso, F Morganti, G Riva. The role of egocentric and allocentric abilities in Alzheimer's disease: a systematic review. *Ageing Res. Rev.* 2014; 16: 32-44.

s48 AA Rizzo, JG Buckwalter and U Neumann. Virtual reality and cognitive rehabilitation: A brief review of the future. *J Head Trauma Rehabil;* 1997, 12(6): 1-15. <http://dx.doi.org/10.1097/00001199-199712000-00002>

s49 Draft global action plan on the public health response to dementia. Report by the Director-General, World Health Organisation; 2017.

([http://apps.who.int/gb/ebwha/pdf\\_files/EB140/B140\\_28-en.pdf?ua=1](http://apps.who.int/gb/ebwha/pdf_files/EB140/B140_28-en.pdf?ua=1), accessed 5 September 2018).
